# Supplementary material for: Cytoreductive Nephrectomy in Select Primary Metastatic Renal Cell Carcinoma Patients: A Comprehensive Nationwide Outcome Analysis
Source: MDPI journal article supplement (doi:10.3390/cancers16061132), 2024-03-12
Supplement: s1 [file s1]

**Supplementary Table S1:** Multivariable adjusted 1-year mortality hazard ratios (HRs) with corresponding 95% confidence intervals (CIs) for risk of death among patients diagnosed with metastatic renal cancer in Denmark 2014-2016.

| Exposures                                                                                                                                                                                                                  | Model 1a<br>HR (95% CI) | MODEL 2B<br>HR (95% CI) |
|----------------------------------------------------------------------------------------------------------------------------------------------------------------------------------------------------------------------------|-------------------------|-------------------------|
| <b>Age</b>                                                                                                                                                                                                                 |                         |                         |
| Age ≤70                                                                                                                                                                                                                    | 1                       | 1                       |
| Age >70                                                                                                                                                                                                                    | 0.99 (0.71-1.38)        | 1.01 (0.70-1.45)        |
| <b>Treatment</b>                                                                                                                                                                                                           |                         |                         |
| CN only                                                                                                                                                                                                                    | 1                       | 1                       |
| TT only                                                                                                                                                                                                                    | 1.35 (0.72-2.55)        | 1.24 (0.65-2.38)        |
| CN plus TT                                                                                                                                                                                                                 | 0.74 (0.39-1.41)        | 0.66 (0.34-1.28)        |
| No treatment                                                                                                                                                                                                               | 4.58 (2.26-9.28)        | 4.71 (2.28-9.73)        |
| <b>IMDC</b>                                                                                                                                                                                                                |                         |                         |
| Poor risk group                                                                                                                                                                                                            | 1                       | 1                       |
| Favorable and Intermediate risk group                                                                                                                                                                                      | 0.47 (0.32-0.70)        | 0.46 (0.30-0.70)        |
| <b>Symptoms</b>                                                                                                                                                                                                            |                         |                         |
| No                                                                                                                                                                                                                         | 1                       | 1                       |
| Yes                                                                                                                                                                                                                        | 1.02 (0.71-1.46)        | 1.03 (0.71-1.50)        |
| <b>Tumor size</b>                                                                                                                                                                                                          |                         |                         |
| Tumor <100 mm                                                                                                                                                                                                              | 1                       | 1                       |
| Tumor ≥100mm                                                                                                                                                                                                               | 1.55 (1.12-2.16)        | 1.59 (1.13-2.24)        |
| <b>Gender</b>                                                                                                                                                                                                              |                         |                         |
| Male                                                                                                                                                                                                                       | 1                       | 1                       |
| Female                                                                                                                                                                                                                     | 1.10 (0.79-1.53)        | 1.12 (0.80-1.57)        |
| <b>Liver+brain+bone sites</b>                                                                                                                                                                                              |                         |                         |
| 1                                                                                                                                                                                                                          | 1                       | 1                       |
| 2                                                                                                                                                                                                                          | 0.95 (0.55-1.63)        | 0.87 (0.50-1.54)        |
| 3                                                                                                                                                                                                                          | 1.91 (0.17-21.44)       | 2.30 (0.18-29.48)       |
| 0                                                                                                                                                                                                                          | 0.95 (0.67-1.36)        | 0.93 (0.65-1.34)        |
| <b>A</b> Model 1: Adjusted for age, gender, tumor stage, tumor size, Fuhrman grade, necrosis status, sarcomatoid<br><b>B</b> Model 2: Model 1 + adjusted for BMI, symptoms, smoking, hypertension, ASA score, MDT decision |                         |                         |
